# Dual Competition between the Basal Ganglia and the Cortex: from Action-Outcome to Stimulus-Response

Meropi Topalidou,<sup>1,2,3,4,†</sup> Daisuke Kase,<sup>2,3,5,†</sup> Thomas Boraud,<sup>2,3,5,6,‡</sup> and Nicolas P. Rougier<sup>1,2,3,4,†,\*</sup>

<sup>1</sup>INRIA Bordeaux Sud-Ouest 33405 Talence, France <sup>2</sup>Institut des Maladies Neurodégénératives, Université de Bordeaux, 33000, Bordeaux, France <sup>3</sup>Institut des Maladies Neurodégénératives, CNRS, UMR 5293, 33000, Bordeaux, France <sup>4</sup>LaBRI, Université de Bordeaux, Institut Polytechnique de Bordeaux, CNRS, UMR 5800, 33405 Talence, France <sup>5</sup>CNRS, French-Israeli Neuroscience Lab, 33000 Bordeaux, France <sup>6</sup>CHU de Bordeaux, Institut MN Clinique, 33000 Bordeaux, France <sup>†</sup>These authors have contributed equally to this work. <sup>‡</sup>These authors have also contributed equally to this work.

\* Corresponding author: [Nicolas.Rougier@inria.fr](mailto:Nicolas.Rougier@inria.fr)

Action-outcome (A-O) and stimulus-response (S-R) processes that are two forms of instrumental conditioning that are important components of decision making and action selection. The former adapts its response according to the outcome while the latter is insensitive to the outcome. An unsolved question is how these two processes emerge, cooperate and interact inside the brain in order to issue a unique behavioral answer. Here we propose a model of the interaction between the cortex, the basal ganglia and the thalamus based on a dual competition. We hypothesize that the striatum, the subthalamic nucleus, the internal pallidum (GPi), the thalamus, and the cortex are involved in closed feedback loops through the hyperdirect and direct pathways. These loops support a competition process that results in the ability for the basal ganglia to make a cognitive decision followed by a motor decision. Considering lateral cortical interactions (short range excitation, long range inhibition), another competition takes place inside the cortex allowing this latter to make a cognitive and a motor decision. We show how this dual competition endows the model with two regimes. One is oriented towards action-outcome and is driven by reinforcement learning, the other is oriented towards stimulus-response and is driven by Hebbian learning. The final decision is made according to a combination of these two mechanisms with a gradual transfer from the former to the latter. We confirmed these theoretical results on primates using a two-armed bandit task and a reversible bilateral inactivation of the internal part of the globus pallidus.

**Keywords:** Cortex, Basal Ganglia, Competition, Short-range Excitation, Long-range Inhibition, Segregated Loops, Direct Pathway, Hyperdirect Pathway, Reinforcement Learning, Hebbian Learning, Covert Learning, Transfer Learning, Stimulus-Response, Action-Outcome

## 1 Introduction

Action-outcome (A-O) and stimulus-response (S-R) processes that are two forms of instrumental conditioning and important components of behavior. The former evaluates the benefit of an action in order to choose the best action among those available (action selection) while the latter is responsible for automatic behavior (routines), eliciting a response as soon as a known stimulus is present (Mishkin, Malamut, & Bachevalier, 1984; Graybiel, 2008), independently of the hedonic value of the stimulus. Action selection can be easily characterized using a simple operant conditioning setup such as for example, a two-armed bandit task where an animal must choose between two options of different value, the value being probability, magnitude or quality of reward (Pasquereau et al., 2007; Guthrie, Leblois, Garenne, & Boraud, 2013). After some trials and errors, a wide variety of vertebrates are able to select the best option (Herrnstein, 1974; Graft, Lea, & Whitworth, 1977; Matthews & Temple, 1979; Bradshaw, Szabadi, Bevan, & Ruddle, 1979; Dougan, McSweeney, & Farmer, 1985; Herrnstein, Vaughan, Mumford, & Kosslyn, 1989; Lau & Glimcher, 2005, 2008; Gilbert-Norton, Shahan, & Shivik, 2009). This selection is believed to result from the behavioral expression of the action-selection system. If the associated values are to be changed after only a few trials, the animal can still adapt its behavior and select rapidly the new best option. However, after intensive training (that depends on the species and the task) and if the same values are used all along, the animal will tend to become insensitive to change and persist in selecting the formerly best option (Lau & Glimcher, 2005; Yin & Knowlton, 2006).

Most of the studies on action selection and habits/routines agree on a slow and incremental transfer from the action-outcome to the stimulus-response system such that after

extensive training, the S-R system takes control of behavior and the animal becomes insensitive to reward devaluation (Packard & Knowlton, 2002; Seger & Spiering, 2011). But very little is known on the exact mechanism underlying such transfer and one difficult question that immediately arises is when and how the brain switches from a flexible action selection system to a more static one. Our working hypothesis is that there is no need for such an explicit switch. We propose instead that an action expressed in the motor area results from both the continuous cooperation (acquisition) and competition (expression) of the two systems.

To do so, we consider the now classical actor-critic model of decision making elaborated in the 1980s that posits there are two separate components in order to explicitly represent the policy independently of the value function. The actor is in charge of choosing an action in a given state (policy) while the critic is in charge of evaluating (criticizing) the current state (value function). This classical view has been used extensively for modelling the basal ganglia (Suri, R E & Schultz, W, 1999; Suri, 2002; Frank, 2004; Doya, 2007; Glimcher, 2011; Doll, Bradley B, Simon, Dylan A, & Daw, Nathaniel D, 2012) even though the precise anatomical mapping of these two components is still subject to debate and may diverge from one model to the other (Redgrave, Peter, Gurney, Kevin, & Reynolds, John, 2008; Niv, Yael & Langdon, Angela, 2016). However, all these models share the implicit assumption that the actor and the critic are acting in concert, i.e. the actor determines the policy exclusively from the values estimated by the critic, as in Q-Learning or SARSA. Interestingly enough, (Sutton, R S & Barto, A G, 1998) noted in their seminal work that one could imagine intermediate architectures in which both an action-value function and an independent policy would be learned. We support this latter hypothesis based

66 on a decision-making model that is grounded on anatomical  
 67 and physiological data and that identify the cortex-basal ganglia  
 68 (CBG) loop as the actor. The critic — of which the Substantia  
 69 Nigra pars compacta (SNc) and the Ventral Tegmental Area  
 70 (VTA) are essential components — interacts through dopamine  
 71 projections to the striatum (Leblois, Boraud, Meissner, Bergman,  
 72 & Hansel, 2006). Decision is generated by symmetry breaking  
 73 mechanism that emerges from competitions processes between  
 74 positives and negatives feedback loop encompassing the full CBG  
 75 network (Guthrie et al., 2013). This model captured faithfully  
 76 behavioural, electrophysiological and pharmacological data we  
 77 obtained in primates using implicit variant of two-armed bandit  
 78 tasks — that assessed both learning and decision making — but  
 79 was less consistent with the explicit version (i.e. when values are  
 80 known from the beginning of the task) that focus on the decision  
 81 process only.

82  
 83 We therefore modified this early model by adding a cortical  
 84 module that has been granted with a competition mechanism  
 85 and Hebbian learning (Doya, 2000). This improved version of  
 86 the model predicts that the whole CBG loop is actually neces-  
 87 sary for the implicit version of the task, however, when the basal  
 88 ganglia feedback to cortex is disconnected, the system is still able  
 89 to choose in the explicit version of the task. Our experimental  
 90 data fully confirmed this prediction (Piron et al., 2016) and al-  
 91 lowed to solve an old conundrum concerning the pathophysiol-  
 92 ogy of the BG which was that lesion or jamming of the output of  
 93 the BG improve Parkinson patient motor symptoms while it af-  
 94 fects marginally their cognitive and psycho-motor performances.  
 95 An interesting prediction of this generalized actor-critic architec-  
 96 ture is that the valuation of options and the behavioural outcome  
 97 are segregated. In the computational model, it implies that if we  
 98 block the output of the basal ganglia in a two-armed bandit task  
 99 before learning, and because reinforcement learning occurred at  
 100 the striatal level under dopaminergic control, this should induce  
 101 covert learning when the model chooses randomly. The goal of  
 102 this study is thus twofold: i) to present a comprehensive descrip-  
 103 tion of the model in order to provide the framework for an exper-  
 104 imental paradigm that allow to unravel covert learning and ii) to  
 105 test this prediction in monkeys.

## 106 Materials and Methods

### 107 The task

108 We consider a variant of a n-armed bandit task (Katehakis &  
 109 Veinott, 1987; Auer, Cesa-Bianchi, Freund, & Schapire, 2002)  
 110 where a player must decide which arm of  $n$  slot machines to play  
 111 in a finite sequence of trials such as to maximize his accumulated  
 112 reward. This task has received much attention in the literature  
 113 (e.g. machine learning, psychology, biology, game theory, eco-  
 114 nomics, neuroscience, etc.) because it provides a simple model to  
 115 explore the trade-off between exploration (trying out a new arm  
 116 to collect information about its payoff) and exploitation (playing  
 117 the arm with the highest expected payoff) (Robbins, 1952; Gittins,  
 118 1979). This task has been shown to be solvable for a large number  
 119 of different living beings, with (Plowright & Shettleworth, 1990;  
 120 Keasar, 2002; Steyvers, Lee, & Wagenmakers, 2009) or without a  
 121 brain (Reid et al., 2016), and even a clever physical apparatus can  
 122 solve the task (Naruse et al., 2015).

### The computational task

123  
 124 In the present study, we restrict the n-armed bandit task to  $n = 2$   
 125 with an explicit dissociation between the choice of the option  
 126 (*cognitive choice*) and the actual triggering of the option (*motor*  
 127 *choice*). This introduces a supplementary difficulty because only  
 128 the motor choice — the physical (and visible) expression of the  
 129 choice — will be taken into account when computing the reward.  
 130 If cognitive and motor choices are incongruent, only the motor  
 choices matters. Unless specified otherwise, we consider a set of

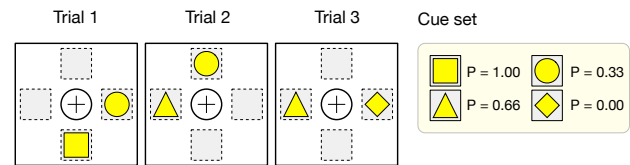

131  
 132 **Figure 1.** Three task trials from a 4-items cue set ( $\square, \triangle, \circ, \diamond$ ) with respective  
 133 reward probabilities (1, 2/3, 1/3, 0).

134 cues  $\{C_i\}_{i \in [1, n]}$  associated with reward probabilities  $\{P_i\}_{i \in [1, n]}$   
 135 and a set of four different locations ( $\{L_i\}_{i \in [1, 4]}$ ) corresponding  
 136 to the *up*, *down*, *left*, *right* positions on the screen. A trial is made  
 137 of the presentation of two random cues  $C_i$  and  $C_j$  ( $i \neq j$ ) at two  
 138 random locations ( $L_i$  and  $L_j$ ) such that we have  $L_i \neq L_j$  (see  
 139 Fig. 1). A session is made of  $n$  successive trials and can use one  
 140 to several different cue sets depending on the condition studied  
 141 (e.g. reversal, devaluation). Unless specified otherwise, in the  
 142 present study, exactly one cue set is used throughout a whole  
 143 session.

144 Once a legal motor decision has been made, reward is com-  
 145 puted by drawing a random uniform number between 0 and 1. If  
 146 the number is less or equal to the reward probability of the cho-  
 147 sen cue, a reward of 1 is given, else, a reward of 0 is given. If no  
 148 motor choice has been made or if the motor choice leads to an  
 149 empty location (illegal choice), the trial is considered to be failed  
 150 and no reward is given, which is different from giving a reward of  
 151 0. Best choice for a trial is defined as the choice of the cue asso-  
 152 ciated with the highest reward probability among the two presented  
 153 cues. Performance is defined as the ratio of best choices over the  
 154 total number of trials. A perfect player with full-knowledge can  
 155 achieve a performance of 1 while the mean expectation of reward  
 is directly dependent on the cue sampling policy<sup>1</sup>.

### 156 The behavioral task

157 *With kind permission from the authors (Piron et al., 2016), we*  
 158 *reproduce here the details of the experimental task which is similar.*

159 The primates were trained daily in the experimental room and  
 160 familiarized with the setup, which consisted of 4 buttons placed  
 161 on a board at different locations ( $0^\circ, 90^\circ, 180^\circ$ , and  $270^\circ$ ) and a  
 162 further button in a central position, which detects contact with a  
 163 monkey's hand. These buttons correspond to the 4 possible dis-  
 164 play positions of a cursor on a vertical screen. The monkeys were  
 165 seated in chairs in front of this screen at a distance of 50cm (Fig.  
 166 2). The monkeys initiated a trial by keeping their hands on the  
 167

<sup>1</sup>For example on Fig. 1, if we consider a uniform cue sampling policy for  $6 \times n$  trials, the mean expected reward for a perfect player with full knowledge is  $3/6 \times 1 + 2/6 \times 2/3 + 1/6 \times 1/3 = 14/18 \approx 0.777\dots$

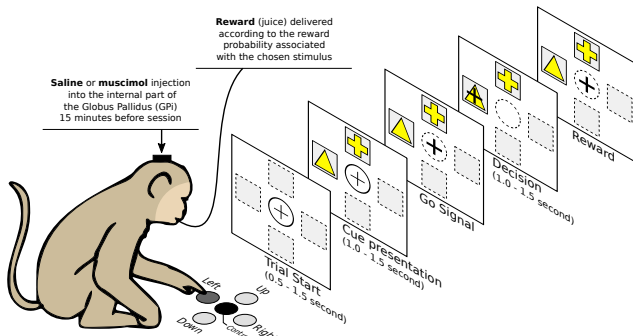

**Figure 2.** The behavioral task. The monkeys initiate a trial by keeping their hands on the central button, which induced the appearance of the cursor in the central position of the screen. After a random delay, two cues appears in 2 different positions. The monkey has a random duration time window (0.5s to 1.5s) to press the button associated with one cue. It moves the cursor over the chosen cue and it has to maintain the position for some duration. After this delay, the monkey is rewarded (0.3 ml of water) or not according to the reward probability of the chosen cue.

168 central button, which induced the appearance of the cursor in the  
 169 central position of the screen. After a random delay (0.5s to 1.5s),  
 170 2 cues appeared in 2 (of 4) different positions determined ran-  
 171 domly for each trial. Each cue had a fixed probability of reward  
 172 ( $P_1 = 0.75$  and  $P_2 = 0.25$ ) and remains the same same during a  
 173 session. Once the cues were shown, the monkeys had a random  
 174 duration time window (0.5s to 1.5s) to press the button associated  
 175 with one cue. It moves the cursor over the chosen cue and they  
 176 have to maintain the position for 0.5 s to 1.5 s. After this delay,  
 177 the monkeys were rewarded (0.3 ml of water) or not according to  
 178 the reward probability of the chosen target. An end-of-trial signal  
 179 corresponding to the disappearance of the cursor was given, indi-  
 180 cating to the monkeys that the trial was finished and they could  
 181 start a new trial after an inter-trial interval between 0.5 s and 1.5s.

## 182 The model

183 The model is designed to study the implications of a dual com-  
 184 petition between the cortex and the basal ganglia (BG). The com-  
 185 petition inside the cortex is conveyed through direct lateral inter-  
 186 actions (short-range excitation and long range inhibition, (H. R.  
 187 Wilson & Cowan, 1972, 1973; Coultrip, Granger, & Lynch, 1992;  
 188 Muir & Cook, 2014; Deco et al., 2014)) while the competition  
 189 within the BG is conveyed through the direct and hyperdirect  
 190 pathways (Leblois et al., 2006; Guthrie et al., 2013). Therefore,  
 191 the indirect pathway and the external segment of the globus pal-  
 192 lidus (GPe) are not included.

## 193 Architecture

194 Our model contains five main groups (see Fig. 3). Three of these  
 195 groups are excitatory. These are the cortex (CTX), the thalamus  
 196 (THL), and the subthalamic nucleus (STN). Two populations are  
 197 inhibitory. They correspond to the sensory-motor territories of  
 198 the striatum (STR) and the GPI. The model has been further tai-  
 199 lored into three segregated loops (Alexander, DeLong, & Strick,  
 200 1986; Alexander & Crutcher, 1990; Alexander, Crutcher, & De-  
 201 Long, 1991; Mink, 1996; Haber, 2003), namely the motor loop,  
 202 the associative loop and the cognitive (or limbic) loop. The mo-  
 203 tor loop comprises the motor cortex (supplementary motor area  
 204 (SMA), primary cortex (M1), premotor cortex (PMC), cingulate

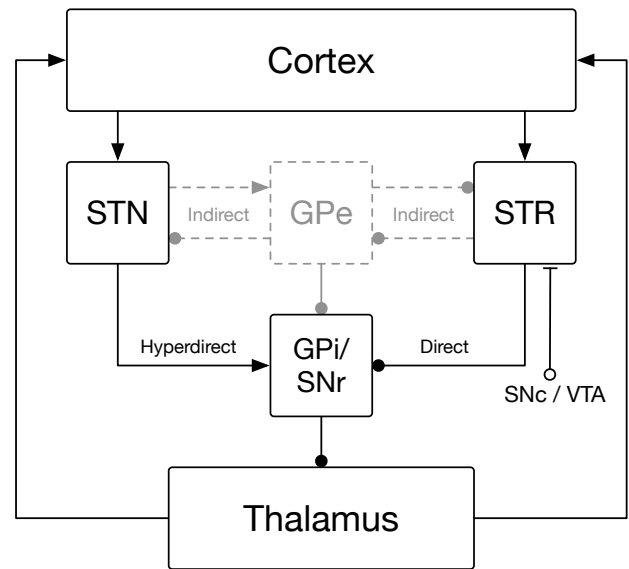

**Figure 3.** Architecture of the model. The architecture of the model is centered around the hyperdirect pathway (cortex → subthalamic nucleus → GPi/SNr → thalamus → cortex), the direct pathway (cortex → striatum → GPi/SNr → thalamus → cortex) and the cortex where lateral interactions take place (not represented on the figure). The external part of the globus pallidus, while not present in the model, is represented on the figure as a reminder of the actual connectivity in the BG. Similarly, the substantia nigra pars compacta is not explicitly represented in the model.

205 motor area (CMA)), the motor striatum (putamen), the motor  
 206 STN, the motor GPi (motor territory of the pallidum and the  
 207 substantia nigra) and the motor thalamus (ventrolateral thalam-  
 208 us (VLm and VLo)). The associative loop comprises the cog-  
 209 nitive cortex (dorsolateral prefrontal cortex (DLPFC), the lateral  
 210 orbitofrontal cortex (LOFC)) and the associative striatum (asso-  
 211 ciative territory of the caudate). The cognitive loop comprises  
 212 the cognitive cortex (anterior cingulate area (ACA), medial or-  
 213 bitofrontal cortex (MOFC)), the cognitive striatum (ventral cau-  
 214 date), the cognitive STN, the cognitive GPi (limbic territory of the  
 215 pallidum and the substantia nigra) and the cognitive thalamus  
 216 (ventral anterior thalamus (VApc, VAmc)).

## 217 Populations

218 The model comprises 12 populations: 5 motor populations, 4 cog-  
 219 nitive populations and 2 associative populations (Fig. 4). These  
 220 populations comprises from 4 to 16 neural assemblies and pos-  
 221 sess each a specific geometry whose goal is to facilitate connec-  
 222 tivity description. Each assembly is modeled using a neuronal rate  
 223 model (Hopfield, 1984; Shriki, Hansel, & Sompolinsky, 2003) that  
 224 give account of the spatial mean firing rate of the neurons com-  
 225 posing the assembly. Each assembly is governed by the following  
 226 equations:

$$227 \tau \frac{dV}{dt} = -V + I_{syn} + I_{ext} + h \quad (1)$$

$$228 U = f(V + V.n) \quad (2)$$

229 where  $\tau$  is the assembly time constant (decay of the synaptic in-  
 230 put),  $V$  is the firing rate of the assembly,  $I_{syn}$  is the synaptic in-  
 231 put to the assembly,  $I_{ext}$  is the external input representing the  
 232 sensory visual salience of the cue,  $h$  is the threshold of the as-  
 233 sembly,  $f$  is the transfer function and  $n$  is the (correlated, white)

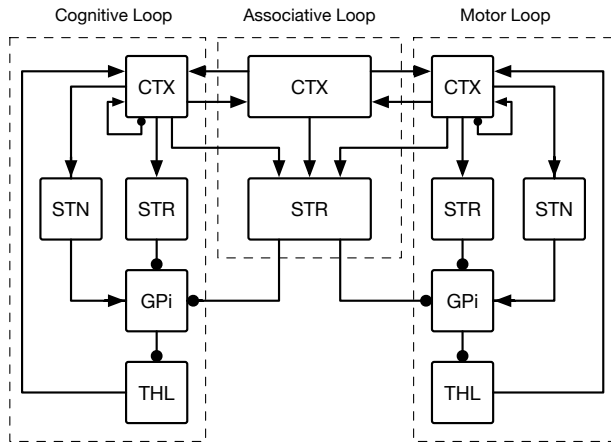

**Figure 4.** Segregated loops. The model is further detailed into three segregated circuits (cognitive, associative, motor). The cognitive and motor circuit each comprises a cortical, a striatal, a thalamic, a subthalamic, and a pallidal population while the associative loop only comprises a cortical and a striatal population. This latter interacts with the two other circuits via diffused connections to the pallidal regions and from all cortical populations. Arrows, excitatory connections. Dots, inhibitory connections.

| Population |             | Geometry | $\tau$ | Threshold | Noise |
|------------|-------------|----------|--------|-----------|-------|
| Cortex     | associative | (4,4)    | 10ms   | -3        | 1.0%  |
|            | cognitive   | (4,1)    | 10ms   | -3        | 1.0%  |
|            | motor       | (1,4)    | 10ms   | -3        | 1.0%  |
| Striatum   | associative | (4,4)    | 10ms   | 0         | 0.1%  |
|            | cognitive   | (4,1)    | 10ms   | 0         | 0.1%  |
|            | motor       | (4,1)    | 10ms   | 0         | 0.1%  |
| GPi        | cognitive   | (4,1)    | 10ms   | -10       | 3.0%  |
|            | motor       | (1,4)    | 10ms   | -10       | 3.0%  |
|            |             |          |        |           |       |
| STN        | cognitive   | (4,1)    | 10ms   | -10       | 0.1%  |
|            | motor       | (1,4)    | 10ms   | -10       | 0.1%  |
|            |             |          |        |           |       |
| Thalamus   | cognitive   | (4,1)    | 10ms   | -40       | 0.1%  |
|            | motor       | (1,4)    | 10ms   | -40       | 0.1%  |
|            |             |          |        |           |       |

**Table 1.** Population parameters

| Name      | Value |
|-----------|-------|
| $V_{min}$ | 1     |
| $V_{max}$ | 20    |
| $V_h$     | 16    |
| $V_c$     | 3     |

**Table 2.** Parameters for striatal sigmoid transfer function

noise term. Each population possess its own set of parameters according to the group it belongs to (see Table 1). Transfer function for all population but the striatal population is a ramp function ( $f(x) = \max(x, 0)$ ). The striatal population that is silent at rest (Sandstrom & Rebec, 2002), requires concerted coordinated input to cause firing (C. J. Wilson & Groves, 1981), and has a sigmoidal transfer function (nonlinear relationship between input current and membrane potential) due to both inward and outward potassium current rectification (Nisenbaum & Wilson, 1995). This is modeled by applying a sigmoidal transfer function to the activation of cortico-costriatal inputs in the form of the Boltzmann equation:

$$f(x) = V_{min} + \frac{V_{max} - V_{min}}{1 + e^{\frac{V_h - x}{V_c}}}$$

where  $V_{min}$  is the minimum activation,  $V_{max}$  the maximum activation,  $V_h$  the half-activation, and  $V_c$  the slope. This is similar to the use of the output threshold in the (Gurney, Prescott, & Redgrave, 2001) model and results in small or no activation to weak inputs with a rapid rise in activation to a plateau level for stronger inputs. The parameters used for this transfer function are shown in Table 2 and were selected to give a low striatal output with no cortical activation (1 spike/s), starting to rise with a cortical input of 10 sp/s and a striatal output of 20 spike/s at a cortical activation of 30 spike/s.

## Connectivity

Even though the model takes advantage of segregated loops, they cannot be entirely separated if we want the cognitive and the motor channel to interact. This is the reason why we incorporated a divergence in the corticostriatal connection followed by a re-convergence within the GPi (Graybiel, Aosaki, Flaherty, & Kimura, 1994; Parent et al., 2000) (see Fig. 5). Furthermore, we considered the somatotopic projection of the pyramidal cortical neurons to the striatum (Webster, 1961) as well as their arborization (Cowan & Wilson, 1994; C. J. Wilson, 1987; Parent et al., 2000; Parthasarathy, Schall, & Graybiel, 1992) resulting in specific localized areas of button formation (Kincaid, Zheng, & Wilson, 1998) and small cortical areas innervating the striatum in a discontinuous pattern with areas of denser innervation separated by areas of sparse innervation (Brown, Smith, & Goldbloom, 1998; Flaherty & Graybiel, 1991). We also considered the large reduction in the number of neurons from cortex to striatum to GPi (Bar-Gad & Bergman, 2001; Oorschot, 1996). These findings combined lead to striatal areas that are mostly specific for input from one cortical area alongside areas where there is overlap between inputs from two or more cortical areas (Takada et al., 2001) and which are here referred to as the associative striatum.

The gain of the synaptic connection from population  $A$  (presynaptic) to population  $B$  (postsynaptic) is denoted as  $G_{A \rightarrow B}$ , and the total synaptic input to population  $B$  is:

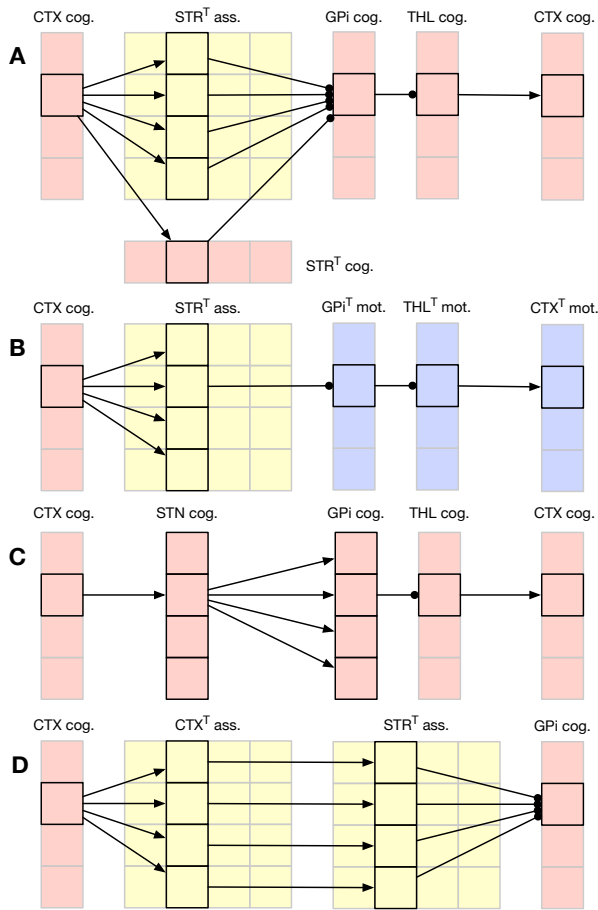

**Figure 5.** Partial connectivity in the cognitive and associative loops. For clarity, only one assembly has been considered. The motor loop is symmetric to the cognitive one. The “T” symbol on some name means the geometry of the group has been transposed (for readability). **A** The direct pathway from cognitive cortical assemblies diverge from cortex to associative and cognitive striatum. the pathway converges into cognitive GPI, send parallel projection to the thalamus and forms a closed loop with the original cognitive cortical assembly. **B** Thanks to the convergence of motor and cognitive pathways in association striatum, there is a cross-talking between the motor and cognitive loops. This allow a decision made in the cognitive loop to influence the decision in motor loops and vice-versa. **C** The hyperdirect pathway from cognitive cortical assembly diverges from STN to GPI, innervating all cognitive, but not motor, GPI regions and feeds back to all cognitive cortical assemblies. **D** The pathway from associative cortex and associative striatum is made of parallel localized projections.

$$I_{syn}^B = G_{A \rightarrow B} \sum_A U_A$$

279 where  $A$  is the presynaptic assembly,  $B$  is the postsynaptic assembly, and  $U_A$  is the output of presynaptic assembly  $A$ . The gains  
 280 for each pathway are shown in Table 3. Gains to the corresponding cognitive (motor) assembly are initially five times higher than  
 281 to each receiving associative area. Re-convergence from cognitive (motor) and association areas of striatum to cognitive (motor) areas  
 282 of GPI are evenly weighted.  
 283  
 284  
 285

### 286 Task encoding

287 At the trial start, assemblies in the cognitive cortex encoding the two cues  $C_1$  and  $C_2$  receive an external current (7Hz) and assemblies  
 288 in the motor cortex encoding the two positions  $M_1$  and  $M_2$  receive similarly an external current (7Hz). These activities  
 289  
 290

| Pop. A   | Pop. B   | Pathway       | Pattern       | Gain  |
|----------|----------|---------------|---------------|-------|
| Cortex   | Striatum | cog. → cog. • | (i,1) → (i,1) | 1.0   |
|          |          | mot. → mot.   | (i,1) → (i,1) | 1.0   |
|          |          | ass. → ass.   | (i,j) → (i,j) | 1.0   |
|          |          | cog. → ass.   | (i,1) → (i,*) | 0.2   |
|          |          | mot. → ass.   | (1,i) → (*,i) | 0.2   |
|          |          |               |               |       |
|          | STN      | cog. → cog.   | (i,1) → (i,1) | 1.0   |
|          |          | mot. → mot.   | (1,i) → (1,i) | 1.0   |
| Thalamus | Cortex   | cog. → cog.   | (i,1) → (i,1) | 0.1   |
|          |          | mot. → mot.   | (1,i) → (1,i) | 0.1   |
|          |          |               |               |       |
| Cortex   | Cortex   | cog. → cog.   | (i,1) → (*,1) | ±0.5  |
|          |          | mot. → mot.   | (1,i) → (1,*) | ±0.5  |
|          |          | ass. → ass.   | (i,j) → (*,*) | ±0.5  |
|          |          | ass. → mot.   | (*i) → (1,i)  | 0.025 |
|          |          | ass. → cog.   | (i,*) → (i,1) | 0.01  |
|          |          | cog. → ass. • | (i,1) → (i,*) | 0.025 |
| Striatum | GPI      | mot. → ass.   | (1,i) → (*,i) | 0.01  |
|          |          | cog. → cog.   | (i,1) → (i,1) | -2.0  |
|          |          | mot. → mot.   | (1,i) → (1,i) | -2.0  |
|          |          | ass. → cog.   | (i,*) → (i,1) | -2.0  |
| STN      | GPI      | ass. → mot.   | (*i) → (1,i)  | -2.0  |
|          |          | cog. → cog.   | (i,1) → (i,1) | 1.0   |
| GPI      | Thalamus | mot. → mot.   | (1,i) → (1,i) | 1.0   |
|          |          | cog. → cog.   | (i,1) → (i,1) | -1.0  |
| Thalamus | Cortex   | mot. → mot.   | (1,i) → (1,i) | -1.0  |
|          |          | cog. → cog.   | (i,1) → (i,1) | 1.0   |
|          |          | mot. → mot.   | (1,i) → (1,i) | 1.0   |

**Table 3.** Connectivity gains and pattern between the different populations. For connectivity patterns, “\*” means all. For example, (1,i) → (1,\*) means one-to-all connectivity while (1,i) → (1,i) means one-to-one connectivity. Plastic pathways are indicated by a “•” symbol.

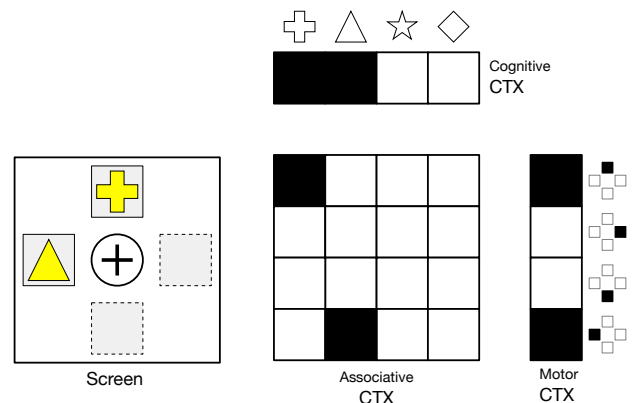

**Figure 6.** Task encoding. Assemblies in the cognitive cortex encoding the two cues  $C_1$  and  $C_2$  receive an external current and assemblies in the motor cortex encoding the two positions  $M_1$  and  $M_2$  receive similarly an external current. These activities are not sufficient to disambiguate between the situation ( $C_1/M_1, C_2/M_2$ ) and the situation ( $C_1/M_2, C_2/M_1$ ). This is the reason why the associative cortex encoding one of these two situations receives an external current, ( $C_1/M_1, C_2/M_2$ ) in the present case.

291 are not sufficient to disambiguate between the situation  $(C_1/M_1,$   
 292  $C_2/M_2)$  and the situation  $(C_1/M_2, C_2/M_1)$ . This is the reason  
 293 why the associative cortex encoding one of these two situations  
 294 receives an external current (7Hz),  $(C_1/M_1, C_2/M_2)$  in the present  
 295 case (see Fig. 6. The decision of the model is decoded from the  
 296 activity in the motor cortex *only*, i.e. independently of the activity  
 297 in the cognitive cortex. If the model chooses a given cue but pro-  
 298 duces the wrong motor command, the cognitive choice will not  
 299 be taken into account and the final choice will be decoded from  
 300 the motor command that may lead to an irrelevant choice.

### 301 Dynamic

302 There exist two different competition mechanisms inside the  
 303 model. One is conveyed through the direct and hyperdirect path-  
 304 ways, the other is conveyed inside the cortex through short-range  
 305 excitation and long range inhibition. The former has been fully  
 306 described and analyzed in Leblois et al., 2006 while the latter been  
 307 extensively studied in a number of experimental and theoretical  
 308 papers (von der Malsburg, 1973; H. R. Wilson & Cowan, 1972,  
 309 1973; Amari, 1977; Callaway, 1998; Taylor, 1999). Each of these  
 310 two competition mechanisms can lead to a decision as illustrated  
 311 on Fig. 7 that shows the dynamic of the motor loop for all the  
 312 population in three conditions. In the absence of the cortical  
 313 interactions (gain of cortical lateral connections has been set to 0),  
 314 the direct and hyperdirect pathway are able to promote a competi-  
 315 tion that result in the selection of one of the two assemblies in  
 316 each group. In the absence of GPI output (connection has been  
 317 cut), the cortical lateral connections are able to support a competi-  
 318 tion that result in the selection of one of the two assemblies, even  
 319 though such decision is generally slower than the basal one. The  
 320 result of the dual competition is a faster selection of one of the  
 321 two assemblies prior to learning, when there is no possibility for the  
 322 two competition to be non congruent (one competition tends to  
 323 select move A while the others tend to select move B). We'll see  
 324 in the results section that if the result of the two competitions is  
 325 non-congruent, the decision is slower.

### 326 Learning

327 Learning has been restricted to the cognitive channel on the  
 328 cortico-striatal synapse (between the cortex cognitive and the  
 329 striatum cognitive) and the cortico-cortical synapse (between the  
 330 cortex cognitive and the cortex associative). There is most proba-  
 331 bly learning in other structures and pathways, but the aim here is  
 332 to show that the proposed restriction is sufficient to produce the  
 333 behavior under consideration. All synaptic weights are initialized  
 334 to 0.5 (SD 0.005) that are used as a multiplier to the pathway  
 335 gain to keep the factors of gain and weight separately observable.  
 336 All weights are bound between  $W_{min}$  and  $W_{max}$  (see Table 4) such  
 337 that for any change  $\Delta W(t)$ , weight  $W(t)$  is updated according to  
 338 the equation:

$$W(t) \leftarrow W(t) + \Delta W(t)(W_{max} - W(t))(W(t) - W_{min})$$

339

340 **Reinforcement learning** At the level of corticostriatal  
 341 synapses, phasic changes in dopamine concentration have been  
 342 shown to be necessary for the production of long-term potentia-  
 343 tion (LTP) (Kerr & Wickens, 2001; Reynolds, Hyland, & Wickens,  
 344 2001; Surmeier, Ding, Day, Wang, & Shen, 2007; Pawlak & Kerr,

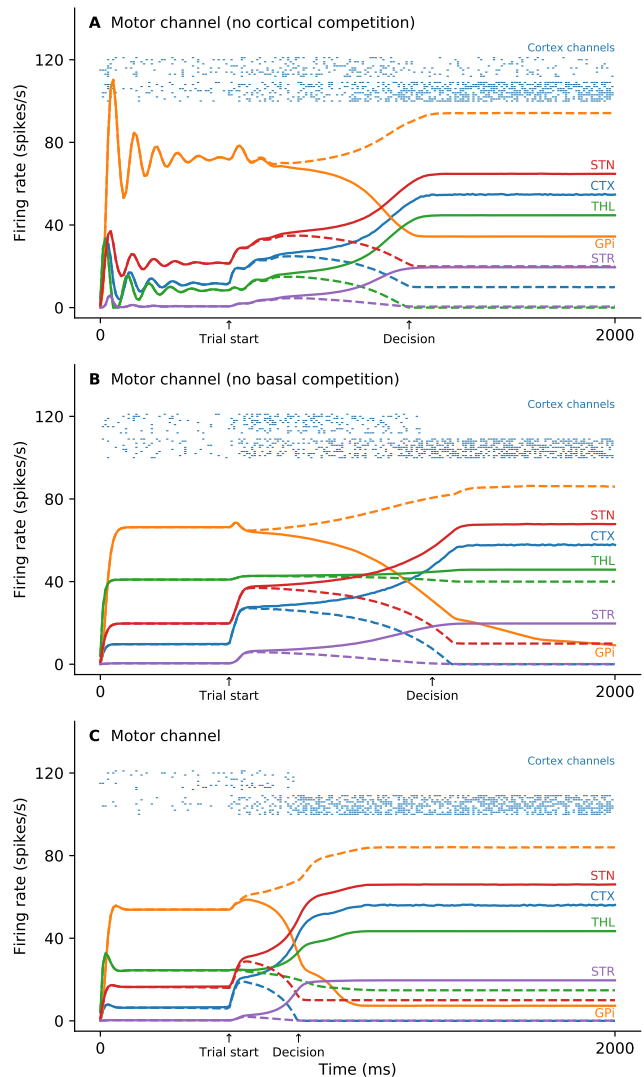

**Figure 7.** Activity in the different populations during a single trial of action selection before learning. The model is started at time  $t=0$ ms and allowed to settle to a steady state before the presentation of the cues at  $t=500$ ms. Solid lines represents activity related to the selected population, dashed lines represent activity related to the non selected population. Decision threshold has been set to 40 spikes/s between the two cortical populations and is indicated on the x axis. Raster plots are related to the cortical populations and has been generated from the firing rate of 10 neurons. **A** Activity in the motor populations in the absence of lateral competition in the cortical populations. The damped oscillations during the settling phase are characteristic of the delayed feedback from the subthalamic nucleus (excitation) and the striatum (inhibitory) through the globus pallidus and the thalamus. **B** Activity in the motor populations in the absence of the feedback from the basal ganglia (GPI) to the cortical populations via the thalamus. Decision threshold is reached thanks to the direct lateral competition in both cognitive and motor cortical channels. There is no damped oscillation since there is no delay between the cortical populations and the decision times are slower than in the previous case. **C** Activity in the motor populations in the full model with a dual competition, one cortical, one basal. When congruent (cortical and basal decision are the same), decision time for both the motor and cortical channels are faster than in the absence of one of the competition loop.

| Name       | Value |
|------------|-------|
| $W_{min}$  | 0.25  |
| $W_{max}$  | 0.75  |
| $LTP_{RL}$ | 0.050 |
| $LTD_{RL}$ | 0.030 |
| $LTP_{HL}$ | 0.005 |
| $\alpha$   | 0.025 |

**Table 4.** Learning parameters

2008). After each trial, once reward has been received (0 or 1), the corticostriatal weights are updated according to:

$$\Delta W_B^A = LTP_{RL} \times RPE \times U_B \text{ if } RPE > 0 \quad (3)$$

$$= LTD_{RL} \times RPE \times U_B \text{ if } RPE < 0 \quad (4)$$

where  $\Delta W_B^A$  is the change in the weight of the corticostriatal synapse from cortical assembly A to striatal assembly B,  $RPE$  is the reward prediction error, the amount by which the actual reward delivered differs from the expected reward,  $U_B$  is the activation of the striatal assembly, and  $\mu$  is the actor learning rate. Generation of LTP and long-term depression (LTD) in striatal MSNs has been found to be asymmetric (Pawlak & Kerr, 2008). Therefore, in the model, the actor learning rate is different for LTP and LTD. The RPE is calculated using a simple critic learning algorithm:

$$RPE = R - V_i$$

where  $R$ , the reward, is 0 or 1, depending on whether a reward was given or not on that trial. Whether a reward was given was based on the reward probability of the selected cue (which is most of the time the one associated with the direction chosen).  $i$  is the number of the cue chosen, and  $V_i$  is the value of cue  $i$ . The value of the chosen cue is then updated using the PE:

$$V_i \leftarrow V_i + \alpha PE$$

**Hebbian learning** At the level of cortico-cortical synapse, only the co-activation of two assemblies is necessary for the production of long-term potentiation (Bear & Malenka, 1994; Caporale & Dan, 2008; Feldman, 2009; Hiratani & Fukai, 2016). After each trial, once a move has been initiated, the cortico-cortical weights are updated according to:

$$\Delta W_B^A = LTP_{HL} \times U_A \times U_B$$

where  $\Delta W_B^A$  is the change in the weight of the cortico-cortical synapse from cognitive cortical assembly A to associative cortical assembly B. This learning rule is thus independent of reward.

## Experimental setup

With kind permission from the authors (Piron et al., 2016), we reproduce here the details of the experimental setup as well as the surgical procedure since the two same monkeys were used for these new experiments.

Experimental data were obtained from 2 female macaque monkeys (*Macaca mulata*). Experiments were performed during the daytime. Monkeys were living under a 12h/12h diurnal

rhythm. Although food access was available ad libitum, the primates were kept under water restriction to increase their motivation to work. A veterinary skilled in healthcare and maintenance in nonhuman primates supervised all aspects of animal care. Experimental procedures were performed in accordance with the Council Directive of 20 October 2010 (2010/63/ UE) of the European Community. This project was approved by the French Ethic Comity for Animal Experimentation (50120111-A).

## Surgical Procedure

Cannula guides were implanted into the left and right GPi in both animals under general anesthesia. Implantation was performed inside a stereotaxic frame guided by ventriculography and single-unit electrophysiological recordings. A ventriculographic cannula was introduced into the anterior horn of the lateral ventricle and a contrast medium was injected. Corrections in the position of the GPi were performed according to the line between the anterior commissure (AC) and the posterior commissure (PC) line. The theoretical target was AP: 23.0mm, L: 7.0 mm, P: 21.2 mm. A linear 16-channel multielectrode array was lowered vertically into the brain. Extracellular single-unit activity was recorded from 0mm to 24 mm relative to the AC-PC line with a wireless recording system. Penetration of the electrode array into the GPi was characterized by an increase in the background activity with the appearance of active neurons with a tonic firing rate (around the AC-PC line). The exit of the electrode tips from the GPi was characterized by the absence of spike (around 3-4 mm below the AC-PC line). When a clear GPi signal from at least 3 contacts had been obtained, control radiography of the position of the recording electrode was performed and compared to the expected position of the target according to the ventriculography. If the deviation from the expected target was less than 1mm, the electrode was removed and a cannula guide was inserted with a spare cannula inside so that the tip of the cannula was superimposed on the location of the electrode array in the control radiography. Once the cannula guide was satisfactorily placed, it was fixed to the skull with dental cement.

## Bilateral Inactivation of the GPi

Micro-injections were delivered bilaterally 15 minutes before a session. For both animals injections of the  $GABA_A$  agonist muscimol hydrobromide (Sigma) or saline (NaCl 9%) were randomly assigned each day. Muscimol was delivered at a concentration of  $1\mu\text{g}/\mu\text{l}$  (dissolved in a NaCl vehicle). Injections ( $1\mu\text{l}$  in each side) were performed at a constant flow rate of  $0.2\mu\text{l}/\text{min}$  using a micro-injection system. Injections were made through a 30-gauge cannulae inserted into the 2 guide cannulae targeting left and right GPi. Cannulas were connected to a  $25\mu\text{l}$  Hamilton syringe by polyethylene cannula tubing.

## Data Analysis

Theoretical and experimental data were analyzed using Kruskal-Wallis rank sum test between the three conditions (saline (C0), muscimol (C1) or saline following muscimol (C2)) for the 6 samples ( $12 \times 10$  first trials of C0 (control),  $12 \times 10$  last trials of C0 (control),  $12 \times 10$  first trials of C1 (GPi Off/muscimol);  $12 \times 10$  last trials of C1 (GPi OFF/muscimol);  $12 \times 10$  first trails of C2 (GPi On/saline);  $12 \times 10$  last trials of C2 (GPi On/saline)) with

436 posthoc pairwise comparisons using Dunn's-test for multiple  
 437 comparisons of independent samples. P-values have been  
 438 adjusted according to the false discovery rate (FDR) procedure  
 439 of Benjamini-Hochberg. Results were obtained from raw data  
 440 using the PMCMR R package (Pohlert, 2014). Significance level  
 441 was set at  $P < 0.01$ .

443 Experimental raw data is available from (Kase & Boraud, 2017)  
 444 under a CC0 license, Theoretical raw data and code are available  
 445 from (Rougier & Topalidou, 2017) under a CC0 license (data) and  
 446 BSD license (code).

## 447 Results

448 Our model predicts that the valuation of options and the be-  
 449 havioural outcome are two separate (but entangled) processes.  
 450 This means that if we block the output of the basal ganglia before  
 451 learning, reinforcement learning still occurs at the striatal level  
 452 under dopaminergic control and this should induce covert learn-  
 453 ing of stimuli value even though the behavioral choice would ap-  
 454 pear as random.

## 455 Protocol

456 The protocol has been consequently split over two consecutive  
 457 conditions (C1 & C2) using the same set of stimuli and a disso-  
 458 ciated control (C0) using a different set of stimuli (using same  
 459 probabilities as for C1 & C2).

460 C0 60 trials, GPi On (model), saline injection (primates),  
 461 stimulus set 1 ( $A_1, B_1$ ) with  $P_{A_1} = 0.75, P_{B_1} = 0.25$

462 C1 60 trials, GPi Off (model), muscimol injection (primates),  
 463 stimulus set 2 ( $A_2, B_2$ ) with  $P_{A_2} = 0.75, P_{B_2} = 0.25$

464 C2 60 trials, GPi On (model), saline injection (primates),  
 465 stimulus set 2 ( $A_2, B_2$ ) with  $P_{A_2} = 0.75, P_{B_2} = 0.25$

## 466 Computational results

| H0                  | statistic (H) | p value |
|---------------------|---------------|---------|
| C0 start = C2 start | 2.965         | 0.0051  |
| C1 start = C2 start | 4.986         | 1.8e-6  |
| C1 end = C2 start   | 3.099         | 0.0036  |

467 **Table 5.** Theoretical results statistical analysis. Kruskal-Wallis rank sum test between  
 468 the three conditions (saline (C0), muscimol (C1) or saline following muscimol (C2)) with  
 469 posthoc pairwise comparisons using Dunn's-test for multiple comparisons of independ-  
 470 ent samples.

471 We tested our hypothesis on the model using 12 different ses-  
 472 sions (corresponding to 12 different initializations of the model).  
 473 On day 1, we suppressed the GPi output by cutting the connec-  
 474 tions between the GPi and the thalamus. When the GPi output  
 475 has been suppressed on day 1, the performance is random at the  
 beginning as shown by the average probability of choosing the  
 best option (expressed in mean $\pm$ SD) in the first 10 trials (0.408  
 $\pm$ 0.161) and remain so until the end of the session (0.525  $\pm$ 0.164).  
 Statistical analysis revealed no significant difference between the

476 10 first and the 10 last trials. On day 2, we re-established connec-  
 477 tions between the GPi and the thalamus and the model has to per-  
 478 form the exact same task as for day 1 using the same set of stimuli.  
 479 Results shows a significant change in behavior: the model starts  
 480 with an above-chance performance on the first 10 trials (0.717  
 $\pm$ 0.241) and this change is significant (see Table 5 and Fig. 8) as  
 481 compared to the start of C1, as compared to the end of C1 and as  
 482 compared to the start of C0, confirming our hypothesis that the  
 483 BG have previously learned the value of stimuli even though they  
 484 were unable to alter behavior.  
 485

## 486 Experimental results

| H0                  | statistic (H) | p value |
|---------------------|---------------|---------|
| C0 start = C2 start | 3.181         | 0.0024  |
| C1 start = C2 start | 3.738         | 0.0004  |
| C1 end = C2 start   | 2.803         | 0.0069  |

487 **Table 6.** Experimental results statistical analysis. Kruskal-Wallis rank sum test be-  
 488 tween the three conditions (saline (C0), muscimol (C1) or saline following muscimol  
 489 (C2)) with posthoc pairwise comparisons using Dunn's-test for multiple comparisons of  
 490 independent samples.

491 We tested the prediction on two female macaque monkeys  
 492 which have been implanted with two cannula guides into the left  
 493 and right GPi (see Materials and Methods section for details).  
 494 In order to inhibit the GPi, we injected bilaterally a GABA ago-  
 495 nist (muscimol, 1 $\mu$ g) 15 minutes before working session on day  
 496 1 (C1). The two monkeys were trained for 7 and 5 sessions re-  
 497 spectively, each session using the same set of stimuli. Results on  
 498 day 1 shows that animals were unable to choose the best stimulus  
 499 in such condition from the start (0.433  $\pm$ 0.236) to the end (0.492  
 500  $\pm$ 0.250) of the session. Statistical analysis revealed no significant  
 501 difference between the 10 first and the 10 last trials on day 1. On  
 502 day 2 (C2), we injected bilaterally a saline solution 15 minutes be-  
 503 fore working session and animals had to perform the exact same  
 504 protocol as for day 1. Results shows a significant change in behav-  
 505 ior (see Table 6 and Fig. 8): animals start with an above-chance  
 performance on the first 10 trials ( $P=0.667 \pm 0.213$ ), as compared  
 to the start of C1, as compared to the end of C1 and as compared  
 to the start of C0, confirming our hypothesis that the BG has pre-  
 viously learned the value of stimuli.

## 506 Discussion

### 507 Covert learning in the BG

508 These results reinforce the classical idea that the basal ganglia  
 509 architecture is based on an actor critic architecture where the  
 510 dopamine serves as a reinforcement signal. However, the pro-  
 511 posed model goes beyond this classical hypothesis and proposes  
 512 a more general view on the role of the BG in behaviour and the  
 513 entanglement with the cortex. Our results, both theoretical and  
 514 experimental, suggest that the critic part of the BG extends its  
 515 role beyond the basal ganglia and makes it *de facto* a central  
 516 component in behavior that can evaluate any action, independently  
 517 of their origin. This hypothesis is very congruent with the results  
 518 introduced in Charlesworth, Warren, and Brainard (2012) where  
 519 authors show that the anterior forebrain pathway in Bengalese  
 520 finches contributes to skill learning even when it is blocked and



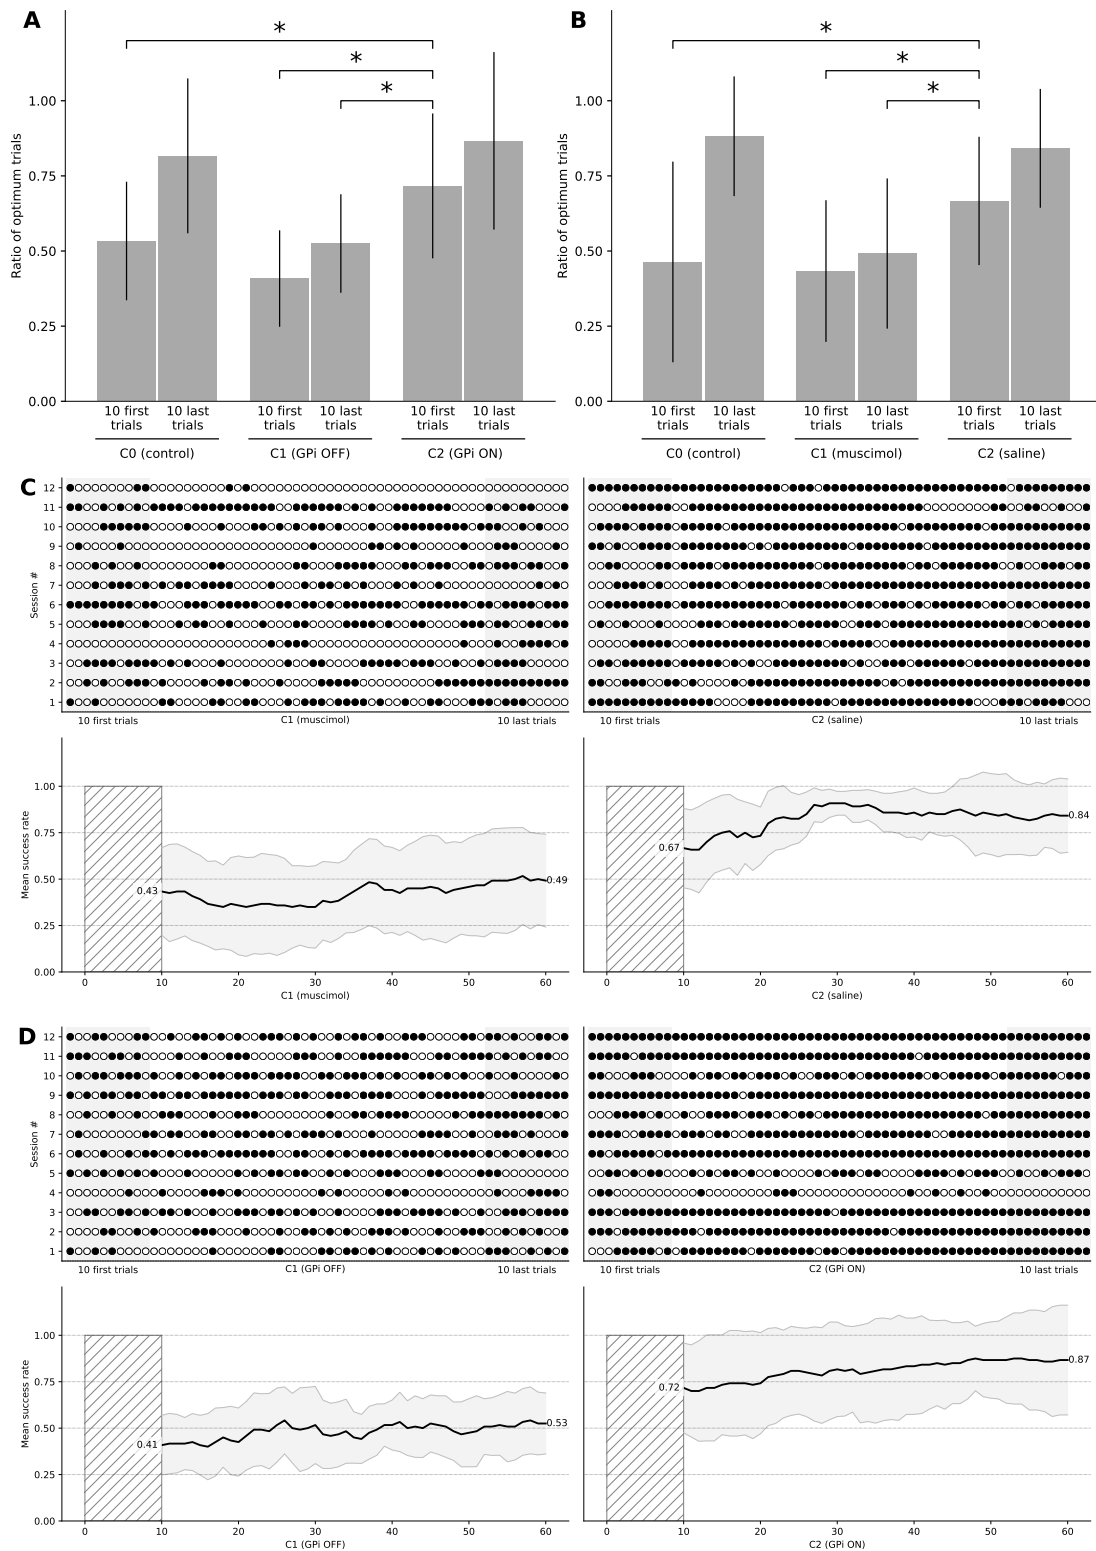

**Figure 8.** Theoretical and experimental results. Histograms show the mean performance at the start and the end of a session in day 1 and day 2 conditions for both the model (A) and the monkeys (B). At the start of day 2, the performance for both the model and the monkeys is significantly higher compared to the start and end of day 1, suggesting some covert learning occurred during day 1 even though performances are random during day 1. C Individual trials ( $n=2 \times 60$ ) for all the sessions ( $n=12$ ) for the primates. D Individual trials ( $n=2 \times 60$ ) for all the sessions ( $n=12$ ) for the model. A black dot means a successful trial (the best stimulus has been chosen), an outlined white dot means a failed trial (the best stimulus has not been chosen). Measure of success is independent of the actual reward received after having chosen one of the two stimuli. The bottom part of each panel shows the mean success rate over a sliding window of ten consecutive trials and averaged across all the sessions. The thick black line is the actual mean and the gray-shaded area represents the standard deviation (STD) over sessions.

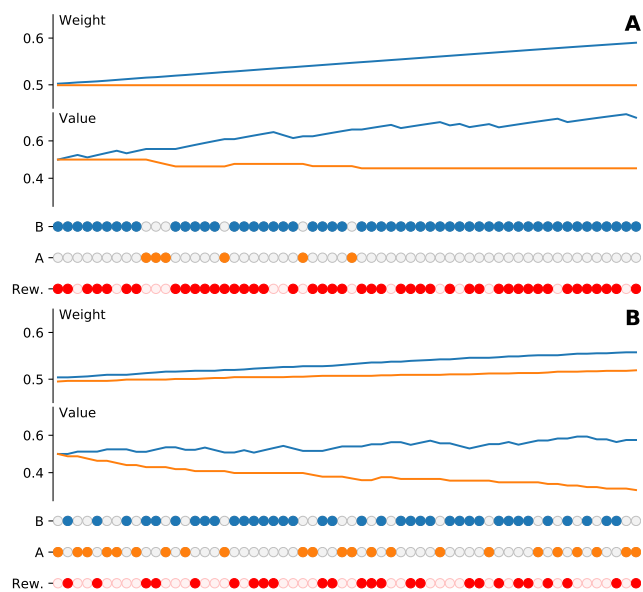

**Figure 9.** Model performance during a single session. Filled dots indicate the chosen cue between A and B. Filled red dots indicate if a reward has been received following the choice. Reward probability is 0.75 for cue A and 0.25 for cue B. **A** Intact model (C0). The BG output drives the decision and evaluates the value of cue A and cue B with a strong bias in favor of A because this cue is chosen more frequently. In the meantime, the Hebbian weight relative to this cue is strongly increased while the weight relative to the other cue doesn't change significantly. **B** Lesioned model (C1). The BG output has been suppressed and decisions are random. Hebbian weights for cue A and cue B are both increased up to similar values at the end of the session. In the meantime, the value of cue A and cue B are evaluated within the BG and the random sampling of cue A and cue B leads to an actual better sampling of value A and B. This is clearly indicated by the estimated value of B that is very close the theoretical value (0.25).

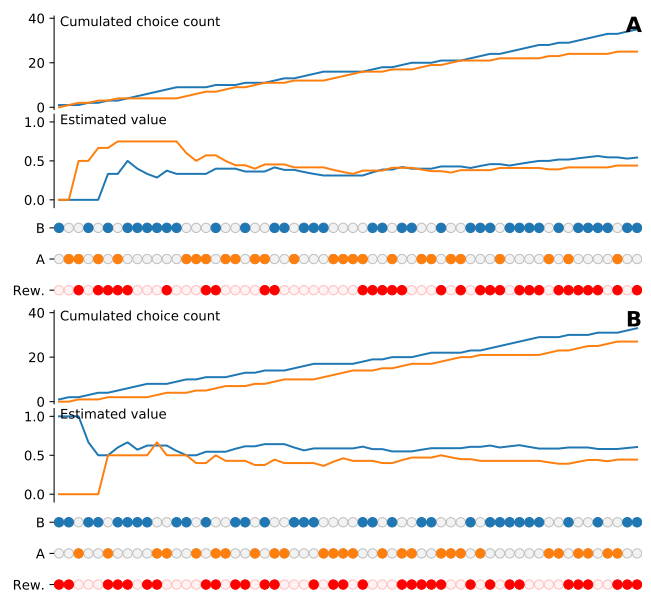

**Figure 10.** Monkey performance during a single session. Filled dots indicate the chosen cue between A and B. Filled red dots indicate if a reward has been received following the choice. Reward probability is 0.75 for cue A and 0.25 for cue B. **A** In saline condition (C0), the monkey is able to slowly choose for the best cue with a slight preferences for A at the end of the 60 trials. Estimation of the perceived value of the two cues shows the actual value of A is greater than the value of B at the end of the session **B** In muscimol condition (C1), the monkey choose cues randomly as indicated by the overall count of choices A and B. Estimation of the perceived value of the two cues (dashed lines) reveals a greater estimation of the value of A compared to the value of B.

## From action-outcome to stimulus-response

549

521 does not participate in the behavioural performance. This is also  
 522 quite compatible with (Ashby, Turner, & Horvitz, 2010; Hélie,  
 523 Ell, & Ashby, 2015) who propose that the BG is a general purpose  
 524 trainer for cortico-cortical connections. Here, we introduced  
 525 a precise computational model using both reinforcement and  
 526 Hebbian learning, supported by experimental data, that explains  
 527 precisely how this general purpose trainer can be biologically  
 528 implemented.  
 529

530 This can be simply understood by scrutinizing a session in control  
 531 and lesion condition (see Fig. 9). In control condition, the  
 532 model learns to select the best cue thanks to the BG. Because it  
 533 learns what is the best stimulus, this induces a preferential selection  
 534 of the best stimulus in order to obtain a higher probability  
 535 of reward. If the process is repeated over many trials, this leads  
 536 implicitly to an over-representation of the more valuable stimuli  
 537 at the cortical level and since cortex learns with Hebbian learning,  
 538 it is implicitly learned. Said differently, the value of the best  
 539 stimulus has been *converted* to the temporal domain. In lesion  
 540 condition, the selection is random and each stimulus is roughly  
 541 selected with equal probability and this allows the BG to evaluate  
 542 the value of the two stimuli even more precisely. We believe this  
 543 is the same for the monkeys even though we do not have access  
 544 to internal value and weights. However, we can see on Fig. 10  
 545 that the estimated value of stimuli (computed as the probability  
 546 of reward) reflects the highest value for the best stimulus. Similarly,  
 547 the number of time a given stimulus has been selected is  
 548 correlated with its actual value even if it is not significant.

550 These new results, together with our previous results (Piron  
 551 et al., 2016) shed a new light on a plausible neural mechanism  
 552 responsible for the gradual mix between an action-outcome  
 553 behavior and a stimulus-response one. The novelty in our  
 554 hypothesis is that there is no transfer *per se*. There is instead a  
 555 joint combination of the two systems that act and learn together  
 556 and we tend to disagree with the hypothesis of a hierarchical  
 557 system (Dezfouli & Balleine, 2013). In our case, the final  
 558 behavioral decision results from a subtle balance between the  
 559 two decisions. When a new task needs to be solved, the basal  
 560 ganglia initially drives the decision because it has initially a faster  
 561 dynamic. In the meantime, the cortex takes advantage of this  
 562 driving and gradually learns the decision independently of the  
 563 reward. We've shown how this could be the case for monkeys,  
 564 even though we lack experimental evidence that the decision in  
 565 muscimol condition is actually driven by the cortex. The actual  
 566 combination of the two systems might be more complex than  
 567 a simple weighted linear combination and this make the study  
 568 even more difficult to carry on. What we see at the experimental  
 569 level might the projection of a more complex phenomenon.  
 570 Persisting in a devaluated task does not mean the system is *frozen*  
 571 but the time to come back from a stimulus-response oriented  
 572 behavior might be simply much longer than the time to initially  
 573 acquire the behavior.  
 574

575 Finally, our results suggest a behavioral decision results from  
 576 both the cooperation (acquisition) and competition (expression)  
 577 of two distinct but entangled systems.

## References

- 579 Alexander, G. E. & Crutcher, M. D. (1990). Functional architecture of basal gan- 580 glia circuits: Neural substrates of parallel processing. *Trends in neuro-* 581 *sciences*. doi:10.1016/0166-2236(90)90107-L
- 582 Alexander, G. E., Crutcher, M. D., & DeLong, M. R. (1991). Chapter 6 basal 583 ganglia-thalamocortical circuits: Parallel substrates for motor, oculo- 584 motor, "prefrontal" and "limbic" functions. In *Progress in brain research* 585 (pp. 119–146). Elsevier. doi:10.1016/s0079-6123(08)62678-3
- 586 Alexander, G. E., DeLong, M. R., & Strick, P. L. (1986). Parallel organization of 587 functionally segregated circuits linking basal ganglia and cortex. *Annual* 588 *Review of Neuroscience*, 9(1), 357–381. doi:10.1146/annurev.ne. 589 09.030186.002041
- 590 Amari, S.-i. (1977). Dynamics of pattern formation in lateral-inhibition type 591 neural fields. *Biological Cybernetics*, 27(2), 77–87. doi:10.1007/ 592 bf00337259
- 593 Ashby, F. G., Turner, B. O., & Horvitz, J. C. (2010). Cortical and basal ganglia 594 contributions to habit learning and automaticity. *Trends in Cognitive* 595 *Sciences*, 14(5), 208–215. doi:10.1016/j.tics.2010.02.001
- 596 Auer, P., Cesa-Bianchi, N., Freund, Y., & Schapire, R. E. (2002). The nonstochas- 597 tic multiarmed bandit problem. *SIAM Journal on Computing*, 32(1), 48– 598 77. doi:10.1137/S0097539701398375
- 599 Bar-Gad, I. & Bergman, H. (2001). Stepping out of the box: Information pro- 600 cessing in the neural networks of the basal ganglia. *Current Opinion in* 601 *Neurobiology*, 11(6), 689–695. doi:10.1016/s0959-4388(01)00270-7
- 602 Bear, M. F. & Malenka, R. C. (1994). Synaptic plasticity: LTP and LTD. *Current* 603 *Opinion in Neurobiology*, 4(3), 389–399. doi:10.1016/0959-4388(94) 604 90101-5
- 605 Bradshaw, C. M., Szabadi, E., Bevan, P., & Ruddle, H. V. (1979). The effect of 606 signaled reinforcement availability on concurrent performances in hu- 607 mans. *Journal of the Experimental Analysis of Behavior*, 32(1), 65–74. 608 doi:10.1901/jeab.1979.32-65
- 609 Brown, L. L., Smith, D. M., & Goldbloom, L. M. (1998). Organizing principles 610 of cortical integration in the rat neostriatum: Corticostriate map of the 611 body surface is an ordered lattice of curved laminae and radial points. 612 *The Journal of Comparative Neurology*, 392(4), 468–488. doi:10.1002/ 613 (SICI)1096-9861(19980323)392:4<468::AID-CNE5>3.0.CO;2-Z
- 614 Callaway, E. M. (1998). Local circuits in primary visual cortex of the macaque 615 monkey. *Annual Review of Neuroscience*, 21(1), 47–74. doi:10.1146/ 616 annurev.neuro.21.1.47
- 617 Caporale, N. & Dan, Y. (2008). Spike timing-dependent plasticity: A hebbian 618 learning rule. *Annual Review of Neuroscience*, 31(1), 25–46. doi:10. 619 1146/annurev.neuro.31.060407.125639
- 620 Charlesworth, J. D., Warren, T. L., & Brainard, M. S. (2012). Covert skill learning 621 in a cortical-basal ganglia circuit. *Nature*, 486(7402), 251–255.
- 622 Coultrip, R., Granger, R., & Lynch, G. (1992). A cortical model of winner-take-all 623 competition via lateral inhibition. *Neural Networks*, 5(1), 47–54. doi:10. 624 1016/s0893-6080(05)80006-1
- 625 Cowan, R. L. & Wilson, C. J. (1994). Spontaneous firing patterns and axonal 626 projections of single corticostriatal neurons in the rat medial agranular 627 cortex. *Journal of Neurophysiology*, 71(1), 17–32.
- 628 Deco, G., Ponce-Alvarez, A., Hagmann, P., Romani, G. L., Mantini, D., & Cor- 629 betta, M. (2014). How local excitation-inhibition ratio impacts the 630 whole brain dynamics. *Journal of Neuroscience*, 34(23), 7886–7898. 631 doi:10.1523/jneurosci.5068-13.2014
- 632 Dezfouli, A. & Balleine, B. W. (2013). Actions, action sequences and habits: Ev- 633 idence that goal-directed and habitual action control are hierarchically 634 organized. *PLoS Computational Biology*, 9(12), e1003364. doi:10.1371/ 635 journal.pcbi.1003364
- 636 Doll, Bradley B, Simon, Dylan A, & Daw, Nathaniel D. (2012). The ubiquity of 637 model-based reinforcement learning. *Current Opinion in Neurobiology*, 638 22(6), 1075–1081.
- 639 Dougan, J. D., McSweeney, F. K., & Farmer, V. A. (1985). Some parameters of 640 behavioral contrast and allocation of interim behavior in rats. *Journal* 641 *of the Experimental Analysis of Behavior*, 44(3), 325–335. doi:10.1901/ 642 jeab.1985.44-325
- 643 Doya, K. (2000). Complementary roles of basal ganglia and cerebellum in learn- 644 ing and motor control. *Current Opinion in Neurobiology*, 10(6), 732– 645 739.
- 646 Doya, K. (2007). Reinforcement learning: Computational theory and biological 647 mechanisms. *HFSP Journal*, 1(1), 30–11.
- 648 Feldman, D. E. (2009). Synaptic mechanisms for plasticity in neocortex. *Annual* 649 *Review of Neuroscience*, 32(1), 33–55. doi:10.1146/annurev.neuro. 650 051508.135516
- 651 Flaherty, A. W. & Graybiel, A. M. (1991). Corticostriatal transformations in 652 the primate somatosensory system. projections from physiologically mapped body-part representations. *Journal of Neurophysiology*, 66(4), 653 1249–1263. 654
- 655 Frank, M. J. (2004). By carrot or by stick: Cognitive reinforcement learning in 656 parkinsonism. *Science*, 306(5703), 1940–1943. doi:10.1126/science. 657 1102941
- 658 Gilbert-Norton, L. B., Shahan, T. A., & Shivik, J. A. (2009). Coyotes (canis la- 659 trans) and the matching law. *Behavioural Processes*, 82(2), 178–183. 660 doi:10.1016/j.beproc.2009.06.005
- 661 Gittins, J. C. (1979). Bandit processes and dynamic allocation indices. *Journal of* 662 *the Royal Statistical Society. Series B (Methodological)*, 41(2), 148–177.
- 663 Glimcher, P. W. (2011). Understanding dopamine and reinforcement learn- 664 ing: the dopamine reward prediction error hypothesis. *Proceedings of* 665 *the National Academy of Sciences*, 108 Suppl 3(Supplement 3), 15647– 666 15654.
- 667 Graft, D. A., Lea, S. E. G., & Whitworth, T. L. (1977). The matching law in and 668 within groups of rats1. *Journal of the Experimental Analysis of Behavior*, 669 27(1), 183–194. doi:10.1901/jeab.1977.27-183
- 670 Graybiel, A. M. (2008). Habits, rituals, and the evaluative brain. *Annual Re-* 671 *view of Neuroscience*, 31(1), 359–387. doi:10.1146/annurev.neuro.29. 672 051605.112851
- 673 Graybiel, A. M., Aosaki, T., Flaherty, A. W., & Kimura, M. (1994). The basal gan- 674 glia and adaptive motor control. *Science*, 265(5180), 1826–1831. doi:10. 675 1126/science.8091209
- 676 Gurney, K., Prescott, T. J., & Redgrave, P. (2001). A computational model 677 of action selection in the basal ganglia. II. analysis and simulation 678 of behaviour. *Biological Cybernetics*, 84(6), 411–423. doi:10.1007/ 679 pl00007985
- 680 Guthrie, M., Leblois, A., Garenne, A., & Boraud, T. (2013). Interaction between 681 cognitive and motor cortico-basal ganglia loops during decision mak- 682 ing: A computational study. *Journal of Neurophysiology*, 109, 3025– 683 3040. doi:10.1152/jn.00026.2013
- 684 Haber, S. N. (2003). The primate basal ganglia: Parallel and integrative networks. 685 *Journal of Chemical Neuroanatomy*, 26(4), 317–330. doi:10.1016/j. 686 jchemneu.2003.10.003
- 687 Hélie, S., Ell, S. W., & Ashby, F. G. (2015). Learning robust cortico-cortical asso- 688 ciations with the basal ganglia: An integrative review. *Cortex*, 64, 123– 689 135. doi:10.1016/j.cortex.2014.10.011
- 690 Herrnstein, R. J. (1974). Formal properties of the matching law1. *Journal of the* 691 *Experimental Analysis of Behavior*, 21(1), 159–164. doi:10.1901/jeab. 692 1974.21-159
- 693 Herrnstein, R. J., Vaughan, W., Mumford, D. B., & Kosslyn, S. M. (1989). Teach- 694 ing pigeons an abstract relational rule: Insideneess. *Perception & Psy-* 695 *chophysics*, 46(1), 56–64. doi:10.3758/bf03208074
- 696 Hiratani, N. & Fukai, T. (2016). Hebbian wiring plasticity generates efficient 697 network structures for robust inference with synaptic weight plasticity. 698 *Frontiers in Neural Circuits*, 10. doi:10.3389/fncir.2016.00041
- 699 Hopfield, J. J. (1984). Neurons with graded response have collective computa- 700 tional properties like those of two-state neurons. *Proceedings of the Na-* 701 *tional Academy of Sciences*, 81(10), 3088–3092.
- 702 Kase, D. & Boraud, T. (2017). Covert learning in the basal ganglia: Raw data. 703 FigShare. doi:10.6084/m9.figshare.4753507.v1
- 704 Katehakis, M. N. & Veinott, A. F. (1987). The multi-armed bandit problem: 705 Decomposition and computation. *Mathematics of Operations Research*, 706 12(2), 262–268. doi:10.1287/moor.12.2.262
- 707 Keasar, T. (2002). Bees in two-armed bandit situations: Foraging choices and 708 possible decision mechanisms. *Behavioral Ecology*, 13(6), 757–765. 709 doi:10.1093/beheco/13.6.757
- 710 Kerr, J. N. D. & Wickens, J. R. (2001). Dopamine d-1/d-5 receptor activation 711 is required for long-term potentiation in the rat neostriatum in vitro. 712 *Journal of Neurophysiology*, 85(1), 117–124.
- 713 Kincaid, A. E., Zheng, T., & Wilson, C. J. (1998). Connectivity and convergence 714 of single corticostriatal axons. *Journal of Neuroscience*, 18(12), 4722– 715 4731.
- 716 Lau, B. & Glimcher, P. W. (2005). Dynamic response-by-response models of 717 matching behavior in rhesus monkeys. *Journal of the Experimental* 718 *Analysis of Behavior*, 84(3), 555–579. doi:10.1901/jeab.2005.110-04
- 719 Lau, B. & Glimcher, P. W. (2008). Value representations in the primate stri- 720 um during matching behavior. *Neuron*, 58(3), 451–463. doi:10.1016/j. 721 neuron.2008.02.021
- 722 Leblois, A., Boraud, T., Meissner, W., Bergman, H., & Hansel, D. (2006). Com- 723 petition between feedback loops underlies normal and pathological dy- 724 namics in the basal ganglia. *Journal of Neurosciences*, 26, 3567–3583. 725 doi:10.1523/JNEUROSCI.5050-05.2006
- 726 Matthews, L. R. & Temple, W. (1979). Concurrent schedule assessment of food 727 preference in cows. *Journal of the Experimental Analysis of Behavior*, 728 32(2), 245–254. doi:10.1901/jeab.1979.32-245

- 729 Mink, J. W. (1996). The basal ganglia: Focused selection and inhibition of  
730 competing motor programs. *Progress in Neurobiology*, 50(4), 381–425.  
731 doi:10.1016/S0301-0082(96)00042-1
- 732 Mishkin, M., Malamut, B., & Bachevalier, J. (1984). Memories and habits: Two  
733 neural systems. In G. Lynch, J. L. McGaugh, & N. M. Weinberger (Eds.),  
734 *Neurobiology of human learning and memory*.
- 735 Muir, D. R. & Cook, M. (2014). Anatomical constraints on lateral competition  
736 in columnar cortical architectures. *Neural Computation*, 26(8), 1624–  
737 1666. doi:10.1162/neco\_a\_00613
- 738 Naruse, M., Berthel, M., Drezet, A., Huang, S., Aono, M., Hori, H., & Kim, S.-J.  
739 (2015). Single-photon decision maker. *Scientific Reports*, 5(1). doi:10.  
740 1038/srep13253
- 741 Nisenbaum, E. S. & Wilson, C. J. (1995). Potassium currents responsible for in-  
742 ward and outward rectification in rat neostriatal spiny projection neu-  
743 rons. *Journal of Neuroscience*, 15(6), 4449–4463.
- 744 Niv, Yael & Langdon, Angela. (2016). Reinforcement learning with Marr. *Current*  
745 *Opinion in Behavioral Sciences*, 11, 67–73.
- 746 Oorschot, D. E. (1996). Total number of neurons in the neostriatal, pallidal, sub-  
747 thalamic, and substantia nigral nuclei of the rat basal ganglia: A stereo-  
748 logical study using the cavalieri and optical disector methods. *The Jour-  
749 nal of Comparative Neurology*, 366(4), 580–599. doi:10.1002/(SICI)  
750 1096-9861(19960318)366:4<580::AID-CNE3>3.0.CO;2-0
- 751 Packard, M. G. & Knowlton, B. J. (2002). Learning and memory functions of the  
752 basal ganglia. *Annual Review of Neuroscience*, 25(1), 563–593. doi:10.  
753 1146/annurev.neuro.25.112701.142937
- 754 Parent, A., Sato, F., Wu, Y., Gauthier, J., Lévesque, M., & Parent, M. (2000). Or-  
755 ganization of the basal ganglia: The importance of axonal collateraliza-  
756 tion. *Trends in Neurosciences*, 23, S20–S27. doi:10.1016/s1471-1931(00)  
757 00022-7
- 758 Parthasarathy, H., Schall, J., & Graybiel, A. M. (1992). Distributed but conver-  
759 gent ordering of corticostriatal projections: Analysis of the frontal eye  
760 field and the supplementary eye field in the macaque monkey. *Journal*  
761 *of Neuroscience*, 12(11), 4468–4488.
- 762 Pasquereau, B., Nadjar, A., Arkadir, D., Bezdard, E., Goillandeau, M., Bioulac,  
763 B., Gross, C. E., & Boraud, T. (2007). Shaping of motor responses by in-  
764 centive values through the basal ganglia. *Journal of Neuroscience*, 27(5),  
765 1176–1183. doi:10.1523/jneurosci.3745-06.2007
- 766 Pawlak, V. & Kerr, J. N. D. (2008). Dopamine receptor activation is required  
767 for corticostriatal spike-timing-dependent plasticity. *Journal of Neuro-  
768 science*, 28(10), 2435–2446. doi:10.1523/jneurosci.4402-07.2008
- 769 Piron, C., Kase, D., Topalidou, M., Goillandeau, M., Orignac, H., N’Guyen, T.-H.,  
770 Rougier, N. P., & Boraud, T. (2016). The globus pallidus pars interna in  
771 goal-oriented and routine behaviors: Resolving a long-standing para-  
772 dox. *Movement Disorders*, 31(8), 1146–1154. doi:10.1002/mds.26542
- 773 Plowright, C. & Shettleworth, S. J. (1990). The role of shifting in choice behavior  
774 of pigeons on a two-armed bandit. *Behavioural Processes*, 21(2-3), 157–  
775 178. doi:10.1016/0376-6357(90)90022-8
- 776 Pohlert, T. (2014). *The pairwise multiple comparison of mean ranks package*  
777 (*pmcmr*). R Package. Retrieved from [http://CRAN.R-project.org/  
778 package=PMCMR](http://CRAN.R-project.org/package=PMCMR)
- 779 Redgrave, Peter, Gurney, Kevin, & Reynolds, John. (2008). What is reinforced  
780 by phasic dopamine signals? *Brain Research Reviews*, 58(2), 322–339.
- 781 Reid, C. R., MacDonald, H., Mann, R. P., Marshall, J. A. R., Latty, T., & Garnier,  
782 S. (2016). Decision-making without a brain: How an amoeboid organ-  
783 ism solves the two-armed bandit. *Journal of The Royal Society Interface*,  
784 13(119), 20160030. doi:10.1098/rsif.2016.0030
- 785 Reynolds, J. N. J., Hyland, B. I., & Wickens, J. R. (2001). A cellular mechanism  
786 of reward-related learning. *Nature*, 413(6851), 67–70. doi:10.1038/  
787 35092560
- 788 Robbins, H. (1952). Some aspects of the sequential design of experiments. *Bul-  
789 letin of the American Mathematical Society*, 58(5), 527–536. doi:10.  
790 1090/s0002-9904-1952-09620-8
- 791 Rougier, N. P. & Topalidou, M. (2017). Covert learning in the basal ganglia: Code.  
792 doi:10.5281/zenodo.598112
- 793 Sandstrom, M. I. & Rebec, G. V. (2002). Characterization of striatal activity in  
794 conscious rats: Contribution of NMDA and AMPA/kainate receptors to  
795 both spontaneous and glutamate-driven firing. *Synapse*, 47(2), 91–100.  
796 doi:10.1002/syn.10142
- 797 Seger, C. A. & Spiering, B. J. (2011). A critical review of habit learning and the  
798 basal ganglia. *Frontiers in Systems Neuroscience*, 5. doi:10.3389/fnsys.  
799 2011.00066
- 800 Shriki, O., Hansel, D., & Sompolinsky, H. (2003). Rate models for conductance-  
801 based cortical neuronal networks. *Neural Computation*, 15(8), 1809–  
802 1841. doi:10.1162/08997660360675053
- 803 Steyvers, M., Lee, M. D., & Wagenmakers, E.-J. (2009). A bayesian analysis of  
804 human decision-making on bandit problems. *Journal of Mathematical*  
805 *Psychology*, 53(3), 168–179. doi:10.1016/j.jmp.2008.11.002
- 806 Suri, R. E. & Schultz, W. (1999). A neural network model with dopamine-like  
807 reinforcement signal that learns a spatial delayed response task. *Neuro-  
808 science*, 91(3), 871–890.
- 809 Suri, R. E. (2002). TD models of reward predictive responses in dopamine neu-  
810 rons. *Neural Networks*, 15(4-6), 523–533.
- 811 Surmeier, D. J., Ding, J., Day, M., Wang, Z., & Shen, W. (2007). D1 and d2  
812 dopamine-receptor modulation of striatal glutamatergic signaling in  
813 striatal medium spiny neurons. *Trends in Neurosciences*, 30(5), 228–  
814 235. doi:10.1016/j.tins.2007.03.008
- 815 Sutton, R S & Barto, A G. (1998). *Reinforcement learning: An introduction*.
- 816 Takada, M., Tokuno, H., Hamada, I., Inase, M., Ito, Y., Imanishi, M., Hasegawa,  
817 N., Akazawa, T., Hatanaka, N., & Nambu, A. (2001). Organization of  
818 inputs from cingulate motor areas to basal ganglia in macaque monkey.  
819 *European Journal of Neuroscience*, 14(10), 1633–1650. doi:10.1046/j.  
820 0953-816x.2001.01789.x
- 821 Taylor, J. G. (1999). Neural 'bubble' dynamics in two dimensions: Foundations.  
822 *Biological Cybernetics*, 80(6), 393–409. doi:10.1007/s004220050534
- 823 von der Malsburg, C. (1973). Self-organization of orientation sensitive cells in  
824 the striate cortex. *Kybernetik*, 14(2), 85–100. doi:10.1007/bf00288907
- 825 Webster, K. (1961). Cortico-striate interrelations in the albino rat. *Journal of*  
826 *anatomy*, 95, 532–544.
- 827 Wilson, C. J. (1987). Morphology and synaptic connections of crossed cortico-  
828 striatal neurons in the rat. *The Journal of Comparative Neurology*, 263(4),  
829 567–580. doi:10.1002/cne.902630408
- 830 Wilson, C. J. & Groves, P. M. (1981). Spontaneous firing patterns of identified  
831 spiny neurons in the rat neostriatum. *Brain Research*, 220(1), 67–80.  
832 doi:10.1016/0006-8993(81)90211-0
- 833 Wilson, H. R. & Cowan, J. D. (1972). Excitatory and inhibitory interactions in  
834 localized populations of model neurons. *Biophysical Journal*, 12(1), 1–  
835 24. doi:10.1016/s0006-3495(72)86068-5
- 836 Wilson, H. R. & Cowan, J. D. (1973). A mathematical theory of the functional dy-  
837 namics of cortical and thalamic nervous tissue. *Kybernetik*, 13(2), 55–  
838 80. doi:10.1007/bf00288786
- 839 Yin, H. H. & Knowlton, B. J. (2006). The role of the basal ganglia in habit forma-  
840 tion. *Nature Reviews Neuroscience*, 7(6), 464–476. doi:10.1038/nrn1919

## Abbreviations

|       |                                                 |     |
|-------|-------------------------------------------------|-----|
| A-O   | Action – Outcome                                | 842 |
| AC    | Anterior Commissure                             | 843 |
| CMA   | Cingulate motor area                            | 844 |
| CTX   | Cortex                                          | 845 |
| DLPFC | Dorsolateral prefrontal cortex                  | 846 |
| DLS   | Dorsolateral striatum                           | 847 |
| DMS   | Dorsomedial striatum                            | 848 |
| FEF   | Frontal eye fields                              | 849 |
| GPI   | Internal part of the globus pallidus            | 850 |
| GPe   | External part of the globus pallidus            | 851 |
| LTP   | Long-term potentiation                          | 852 |
| LTD   | Long-term depression                            | 853 |
| LOFC  | Lateral orbitofrontal cortex                    | 854 |
| MI    | Primary motor cortex                            | 855 |
| MOFC  | Medial orbitofrontal cortex                     | 856 |
| OFC   | Orbitofrontal cortex                            | 857 |
| PC    | Posterior commissure                            | 858 |
| PFC   | Prefrontal cortex                               | 859 |
| PMC   | Premotor cortex                                 | 860 |
| RPE   | Reward prediction error                         | 861 |
| SMA   | Supplementary motor area                        | 862 |
| SNC   | Substantia nigra pars compacta                  | 863 |
| SNr   | Substantia nigra pars reticulata                | 864 |
| STN   | Subthalamic nucleus                             | 865 |
| STR   | Striatum                                        | 866 |
| S-R   | Stimulus – Response                             | 867 |
| THL   | Thalamus                                        | 868 |
| VLM   | Ventrolateral thalamus, pars medialis           | 869 |
| VLo   | Ventrolateral thalamus, pars oralis             | 870 |
| VApC  | Ventral anterior thalamus, pars parvocellularis | 871 |
| VAMc  | Ventral anterior thalamus, pars magnocellularis | 872 |
